# Supplementary material for: Waterborne Intumescent Coatings Containing Industrial and Bio-Fillers for Fire Protection of Timber Materials
Source: MDPI journal article supplement (doi:10.3390/polym12040757), 2020-03-31
Supplement: s1 [file s1]

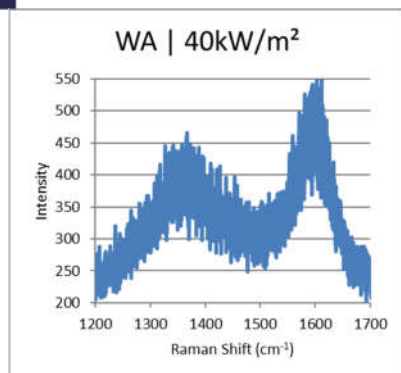

(a)

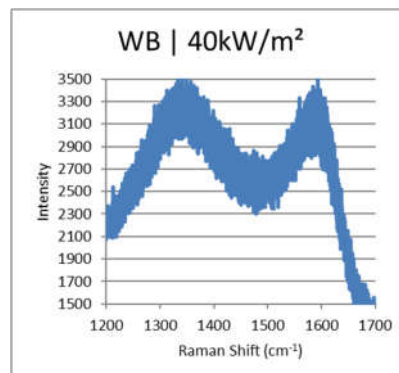

(b)

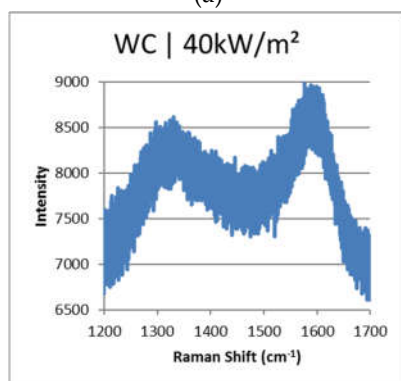

(c)

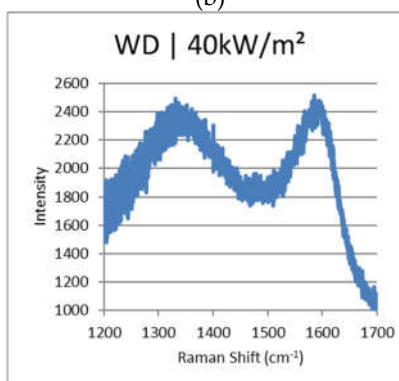

(d)

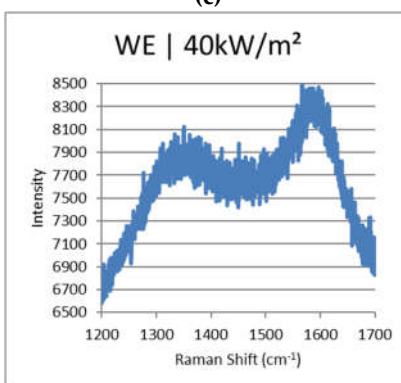

(e)

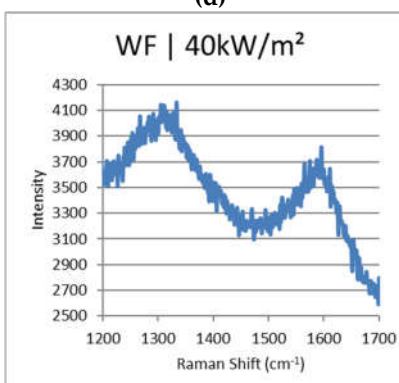

(f)

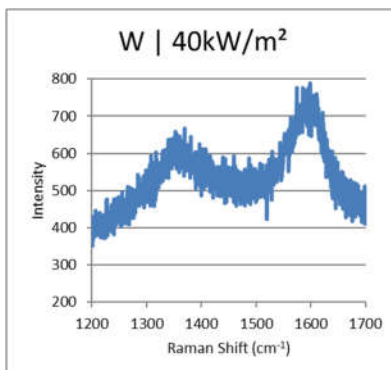

(g)

1 Figure S1. The intensities of peaks from Raman spectra recorded on char residues collected post-cone  
2 calorimetry tests at 40 kW/m<sup>2</sup>, for wood specimens coated the with formulations: A - (a), B - (b), C -  
3 (c), D - (d), E - (e), F - (f), or uncoated - (g).
